# Supplementary material
Source: Elsevier journal article supplement (https://www.sciencedirect.com/science/article/pii/S002175572100084X)

**Supplementary Material 1**

**The Conception, Content Validation, and Test-retest Reliability of the Questionnaire for Screen Time of Adolescents (QueST)**

**Bland–Altman plots of the five screen time items of the QueST and according to week/weekend days**


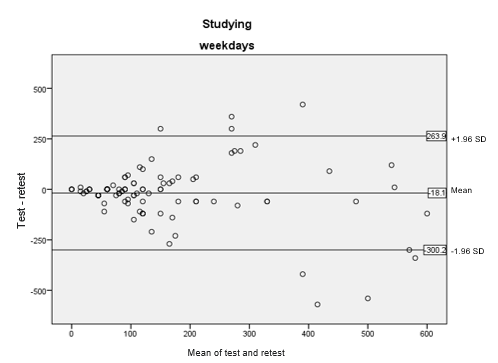


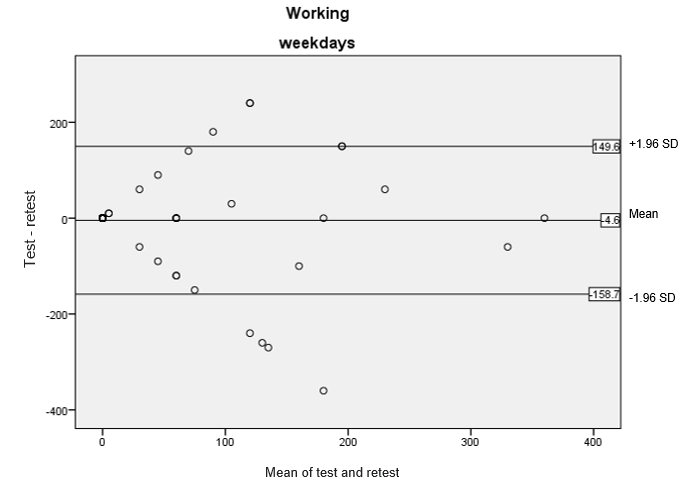


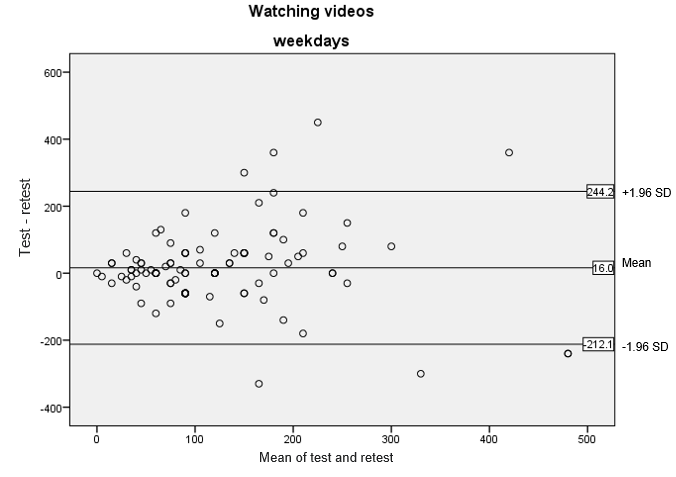


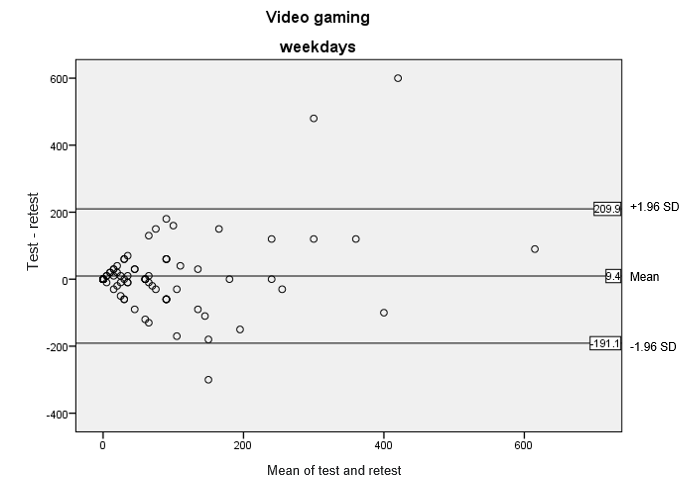


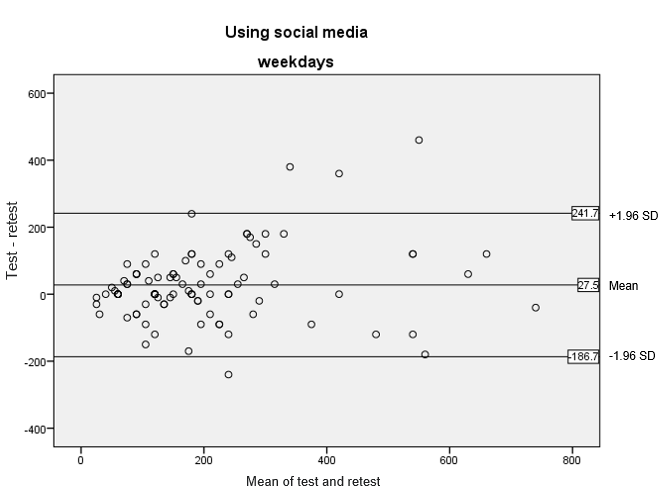


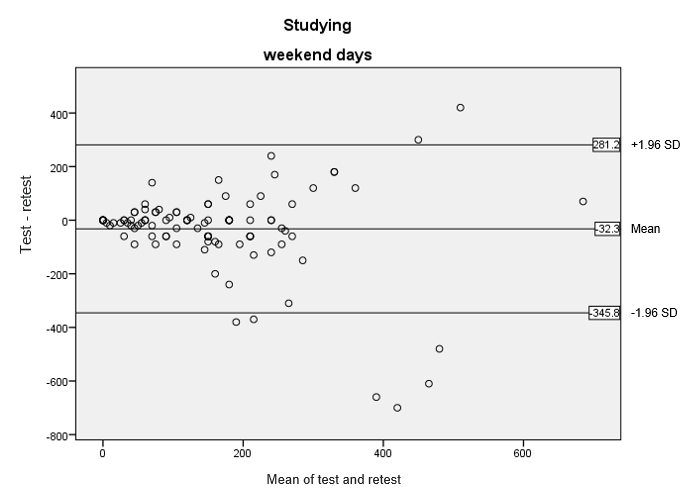


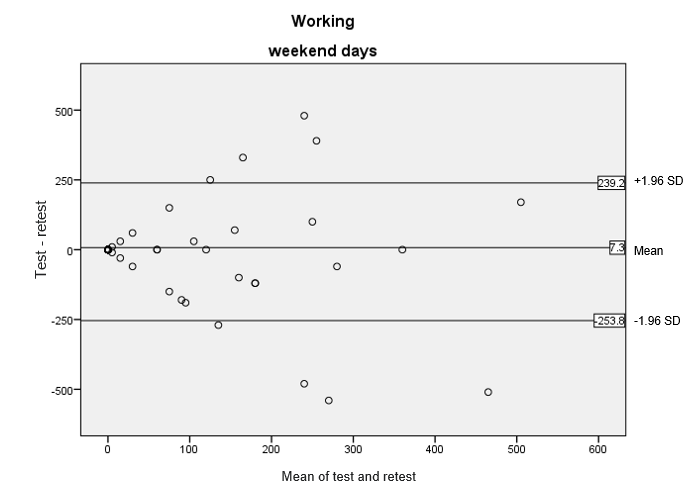


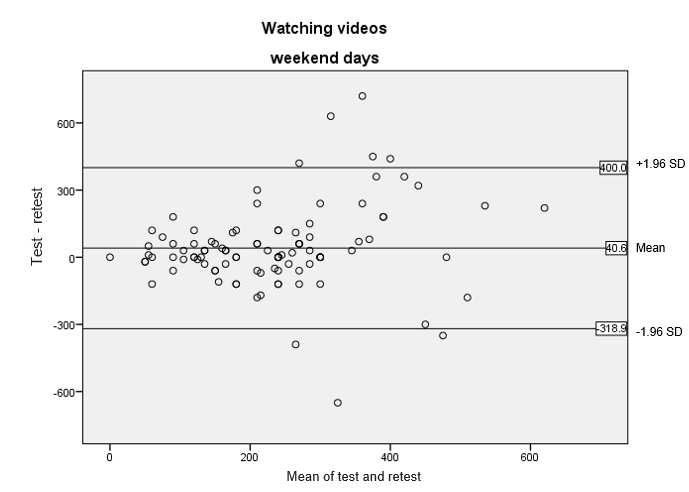


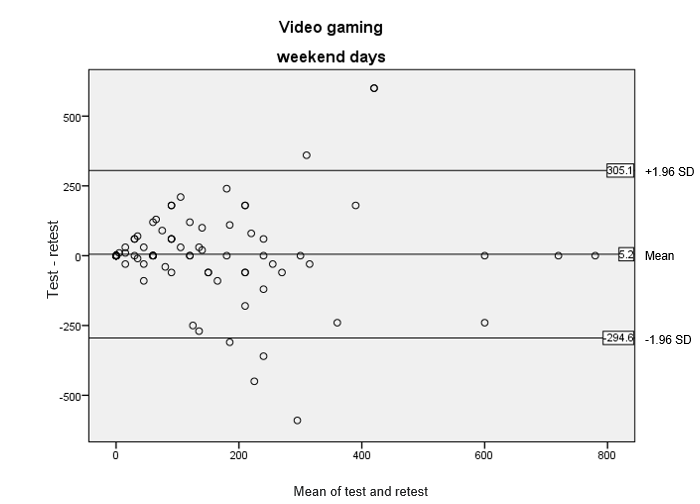


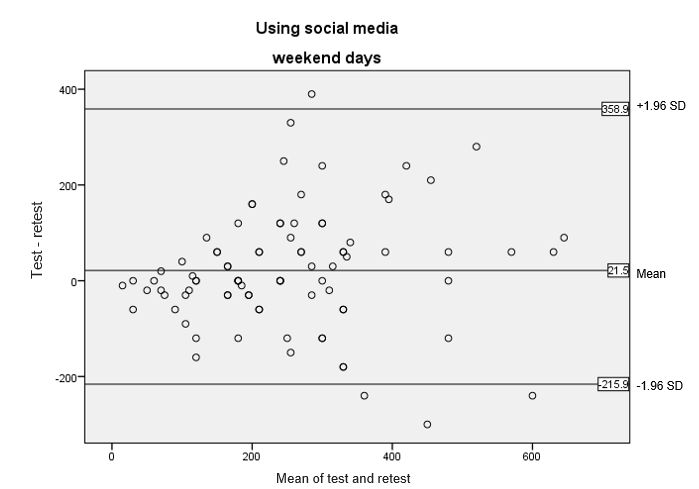

Supplement: mmc1 [file S002175572100084X:mmc1.docx]
